# Supplementary material
Source: ML conference proceedings conference paper supplement (https://proceedings.mlr.press/v89/cheung19b.html)
Supplement: Supplementary file [file cheung19b-supp.pdf]

## A Proof of Theorem 1

First, let's review the lower bound of the linear bandit setting. The linear bandit setting is almost identical to ours except that the  $\theta_t$ 's do not vary across rounds, and are equal to the same (unknown)  $\theta$ , *i.e.*,  $\forall t \in [T] \theta_t = \theta$ .

**Lemma 4** ([20]). *For any  $T_0 \geq \sqrt{d}/2$  and let  $D = \{x \in \mathbb{R}^d : \|x\| \leq 1\}$ , then there exists a  $\theta \in \left\{\pm\sqrt{d/4T_0}\right\}^d$ , such that the worst case regret of any algorithm for linear bandits with unknown parameter  $\theta$  is  $\Omega(d\sqrt{T_0})$ .*

Going back to the non-stationary environment, suppose nature divides the whole time horizon into  $\lceil T/H \rceil$  blocks of equal length  $H$  rounds (the last block can possibly have less than  $H$  rounds), and each block is a decoupled linear bandit instance so that the knowledge of previous blocks cannot help the decision within the current block.

Following Lemma 4, we restrict the sequence of  $\theta_t$ 's are drawn from the set  $\left\{\pm\sqrt{d/4H}\right\}^d$ . Moreover,  $\theta_t$ 's remain fixed within a block, and can vary across different blocks, *i.e.*,

$$\forall i \in \left[\left\lceil\frac{T}{H}\right\rceil\right] \forall t_1, t_2 \in [(i-1)H+1, i \cdot H \wedge T] \quad \theta_{t_1} = \theta_{t_2}. \quad (27)$$

We argue that even if the learner knows this additional information, it still incur a regret  $\Omega(d^{2/3}B_T^{1/3}T^{2/3})$ . Note that different blocks are completely decoupled, and information is thus not passed across blocks. Therefore, the regret of each block is  $\Omega(d\sqrt{H})$ , and the total regret is at least

$$\left(\left\lceil\frac{T}{H}\right\rceil - 1\right) \Omega(d\sqrt{H}) = \Omega(dTH^{-\frac{1}{2}}). \quad (28)$$

Intuitively, if  $H$ , the number of length of each block, is smaller, the worst case regret lower bound becomes larger. But too small a block length can result in a violation of the variation budget. So we work on the total variation of  $\theta_t$ 's to see how small can  $H$  be. The total variation of the  $\theta_t$ 's can be seen as the total variation across consecutive blocks as  $\theta_t$  remains unchanged within a single block. Observe that for any pair of  $\theta, \theta' \in \left\{\pm\sqrt{d/4H}\right\}^d$ , the  $\ell_2$  difference between  $\theta$  and  $\theta'$  is upper bounded as

$$\sqrt{\sum_{i=1}^d \frac{4d}{4H}} = \frac{d}{\sqrt{H}} \quad (29)$$

and there are at most  $\lceil T/H \rceil$  changes across the whole time horizon, the total variation is at most

$$B = \frac{T}{H} \cdot \frac{d}{\sqrt{H}} = dTH^{-\frac{3}{2}}. \quad (30)$$

By definition, we require that  $B \leq B_T$ , and this indicates that

$$H \geq (dT)^{\frac{2}{3}} B_T^{-\frac{2}{3}}. \quad (31)$$

Taking  $H = \left\lceil (dT)^{\frac{2}{3}} B_T^{-\frac{2}{3}} \right\rceil$ , the worst case regret is

$$\Omega\left(dT \left(\left(dT\right)^{\frac{2}{3}} B_T^{-\frac{2}{3}}\right)^{-\frac{1}{2}}\right) = \Omega\left(d^{\frac{2}{3}} B_T^{\frac{1}{3}} T^{\frac{2}{3}}\right). \quad (32)$$

## B Proof of Lemma 1

In the proof, we denote  $B(1)$  as the unit Euclidean ball, and  $\lambda_{\max}(M)$  as the maximum eigenvalue of a square matrix  $M$ . By folklore, we know that  $\lambda_{\max}(M) = \max_{z \in B(1)} z^\top M z$ . In addition, recall the definition that  $V_{t-1}^{-1} = \lambda I + \sum_{s=1 \vee (t-w)}^{t-1} X_s X_s^\top$ . We prove the Lemma as follows:

$$\left\| V_{t-1}^{-1} \sum_{s=1 \vee (t-w)}^{t-1} X_s X_s^\top (\theta_s - \theta_t) \right\| = \left\| V_{t-1}^{-1} \sum_{s=1 \vee (t-w)}^{t-1} X_s X_s^\top \left[ \sum_{p=s}^{t-1} (\theta_p - \theta_{p+1}) \right] \right\|$$

$$= \left\| V_{t-1}^{-1} \sum_{p=1 \vee (t-w)}^{t-1} \sum_{s=1 \vee (t-w)}^p X_s X_s^\top (\theta_p - \theta_{p+1}) \right\| \quad (33)$$

$$\leq \sum_{p=1 \vee (t-w)}^{t-1} \left\| V_{t-1}^{-1} \left( \sum_{s=1 \vee (t-w)}^p X_s X_s^\top \right) (\theta_p - \theta_{p+1}) \right\| \quad (34)$$

$$\leq \sum_{p=1 \vee (t-w)}^{t-1} \lambda_{\max} \left( V_{t-1}^{-1} \left( \sum_{s=1 \vee (t-w)}^p X_s X_s^\top \right) \right) \|\theta_p - \theta_{p+1}\| \quad (35)$$

$$\leq \sum_{p=1 \vee (t-w)}^{t-1} \|\theta_p - \theta_{p+1}\|. \quad (36)$$

Equality (33) is by the observation that both sides of the equation is summing over the terms  $X_s X_s^\top (\theta_p - \theta_{p+1})$  with indexes  $(s, p)$  ranging over  $\{(s, p) : 1 \vee (t-w) \leq s \leq p \leq t-1\}$ . Inequality (34) is by the triangle inequality.

To proceed with the remaining steps, we argue that, for any index subset  $S \subseteq \{1 \vee (t-w), \dots, t-1\}$ , the matrix  $V_{t-1}^{-1} (\sum_{s \in S} X_s X_s^\top)$  is positive semi-definite (PSD). Now, let's denote  $A = \sum_{s \in S} X_s X_s^\top$ . Evidently, matrix  $A$  is PSD, while matrix  $V_{t-1}^{-1}$  is positive definite, and both matrices  $A, V_{t-1}^{-1}$  are symmetric. Matrices  $V_{t-1}^{-1} A$  and  $V_{t-1}^{-1/2} A V_{t-1}^{-1/2}$  have the same sets of eigenvalues, since these matrices have the same characteristics polynomial (with the variable denoted as  $\eta$  below):

$$\begin{aligned} \det(\eta I - V_{t-1}^{-1} A) &= \det(V_{t-1}^{-1/2}) \det(\eta V_{t-1}^{1/2} - V_{t-1}^{-1/2} A) \\ &= \det(\eta V_{t-1}^{1/2} - V_{t-1}^{-1/2} A) \det(V_{t-1}^{-1/2}) = \det(\eta I - V_{t-1}^{-1/2} A V_{t-1}^{-1/2}). \end{aligned}$$

Evidently,  $V_{t-1}^{-1/2} A V_{t-1}^{-1/2}$  is PSD, since for any  $y \in \mathbb{R}^d$  we clearly have  $y^\top V_{t-1}^{-1/2} A V_{t-1}^{-1/2} y = \|A^{1/2} V_{t-1}^{-1/2} y\|^2 \geq 0$  (Matrices  $A^{1/2}, V_{t-1}^{-1/2}$  are symmetric). Altogether, we have shown that  $V_{t-1}^{-1} (\sum_{s=1 \vee (t-w)}^p X_s X_s^\top)$  is PSD.

Inequality (35) is by the fact that, for any matrix  $M \in \mathbb{R}^{d \times d}$  with  $\lambda_{\max}(M) \geq 0$  and any vector  $y \in \mathbb{R}^d$ , we have  $\|My\| \leq \lambda_{\max}(M) \|y\|$ . Without loss of generality, assume  $y \neq 0$ . Now, it is evident that

$$\|My\| = \left\| M \frac{y}{\|y\|} \right\| \cdot \|y\| \leq \left\| \max_{z \in B(1)} Mz \right\| \cdot \|y\| = |\lambda_{\max}(M)| \cdot \|y\| = \lambda_{\max}(M) \|y\|.$$

Applying the above claim with  $M = V_{t-1}^{-1} (\sum_{s=1 \vee (t-w)}^p X_s X_s^\top)$ , which is PSD, and  $y = \theta_p - \theta_{p+1}$  demonstrates inequality (35).

Finally, inequality (36) is by the inequality  $\lambda_{\max} \left( V_{t-1}^{-1} \left( \sum_{s=1 \vee (t-w)}^p X_s X_s^\top \right) \right) \leq 1$ . Indeed,

$$\begin{aligned} \lambda_{\max} \left( V_{t-1}^{-1} \left( \sum_{s=1 \vee (t-w)}^p X_s X_s^\top \right) \right) &= \max_{z \in B(1)} z^\top V_{t-1}^{-1} \left( \sum_{s=1 \vee (t-w)}^p X_s X_s^\top \right) z \\ &\leq \max_{z \in B(1)} \left\{ z^\top V_{t-1}^{-1} \left( \sum_{s=1 \vee (t-w)}^p X_s X_s^\top \right) z + z^\top V_{t-1}^{-1} \left( \sum_{s=p+1}^{t-1} X_s X_s^\top \right) z + \lambda z^\top V_{t-1}^{-1} z \right\} \\ &= \max_{z \in B(1)} z^\top V_{t-1}^{-1} V_{t-1} z = 1, \end{aligned} \quad (37)$$

where inequality (37) is by the property that both matrices  $V_{t-1}^{-1} (\sum_{s=p+1}^{t-1} X_s X_s^\top), V_{t-1}^{-1}$  are PSD, as we establish previously. Altogether, the Lemma is proved.

### C Proof of Theorem 2

Fixed any  $\delta \in [0, 1]$ , we have that for any  $t \in [T]$  and any  $x \in D_t$ ,

$$\begin{aligned} \left| x^\top (\hat{\theta}_t - \theta_t) \right| &= \left| x^\top \left( V_{t-1}^{-1} \sum_{s=1 \vee (t-w)}^{t-1} X_s X_s^\top (\theta_s - \theta_t) \right) + x^\top V_{t-1}^{-1} \left( \sum_{s=1 \vee (t-w)}^{t-1} \eta_s X_s - \lambda \theta_t \right) \right| \\ &\leq \left| x^\top \left( V_{t-1}^{-1} \sum_{s=1 \vee (t-w)}^{t-1} X_s X_s^\top (\theta_s - \theta_t) \right) \right| + \left| x^\top V_{t-1}^{-1} \left( \sum_{s=1 \vee (t-w)}^{t-1} \eta_s X_s - \lambda \theta_t \right) \right| \end{aligned} \quad (38)$$

$$\leq \|x\| \cdot \left\| V_{t-1}^{-1} \sum_{s=1 \vee (t-w)}^{t-1} X_s X_s^\top (\theta_s - \theta_t) \right\| + \|x\|_{V_{t-1}^{-1}} \left\| \sum_{s=1 \vee (t-w)}^{t-1} \eta_s X_s - \lambda \theta_t \right\|_{V_{t-1}^{-1}} \quad (39)$$

$$\leq L \sum_{s=1 \vee (t-w)}^{t-1} \|\theta_s - \theta_{s+1}\| + \|x\|_{V_{t-1}^{-1}} \left[ R \sqrt{d \ln \left( \frac{1 + wL^2/\lambda}{\delta} \right)} + \sqrt{\lambda} S \right], \quad (40)$$

where inequality (38) uses triangular inequality, inequality (39) follows from Cauchy-Schwarz inequality, and inequality (40) are consequences of Lemmas 1, 2.

### D Proof of Theorem 3

In the proof, we choose  $\lambda$  so that  $\beta \geq 1$ , for example by choosing  $\lambda \geq 1/S^2$ . By virtue of UCB, the regret in any round  $t \in [T]$  is

$$\langle x_t^* - X_t, \theta_t \rangle \leq L \sum_{s=1 \vee (t-w)}^{t-1} \|\theta_s - \theta_{s+1}\| + \langle X_t, \hat{\theta}_t \rangle + \beta \|X_t\|_{V_{t-1}^{-1}} - \langle X_t, \theta_t \rangle \quad (41)$$

$$\leq 2L \sum_{s=1 \vee (t-w)}^{t-1} \|\theta_s - \theta_{s+1}\| + 2\beta \|X_t\|_{V_{t-1}^{-1}}. \quad (42)$$

Inequality (41) is by an application of our SW-UCB algorithm established in equation (10). Inequality (42) is by an application of inequality (40), which bounds the difference  $|\langle X_t, \hat{\theta}_t - \theta_t \rangle|$  from above. By the evident fact that  $\langle X_t, \hat{\theta}_t - \theta_t \rangle \leq 2$ , we have

$$\langle x_t^* - X_t, \theta_t \rangle \leq 2L \sum_{s=1 \vee (t-w)}^{t-1} \|\theta_s - \theta_{s+1}\| + 2\beta \left( \|X_t\|_{V_{t-1}^{-1}} \wedge 1 \right). \quad (43)$$

Summing equation (43) over  $1 \leq t \leq T$ , the regret of the SW-UCB algorithm is upper bounded as

$$\begin{aligned} \mathbf{E} [\text{Regret}_T (\text{SW-UCB algorithm})] &= \sum_{t \in [T]} \langle x_t^* - X_t, \theta_t \rangle \\ &\leq 2L \left[ \sum_{t=1}^T \sum_{s=1 \vee (t-w)}^{t-1} \|\theta_s - \theta_{s+1}\| \right] + 2\beta \sum_{t=1}^T \left( \|X_t\|_{V_{t-1}^{-1}} \wedge 1 \right) \\ &= 2L \left[ \sum_{s=1}^T \sum_{t=s+1}^{(s+w) \wedge T} \|\theta_s - \theta_{s+1}\| \right] + 2\beta \sum_{t=1}^T \left( \|X_t\|_{V_{t-1}^{-1}} \wedge 1 \right) \\ &\leq 2LwB_T + 2\beta \sum_{t=1}^T \left( \|X_t\|_{V_{t-1}^{-1}} \wedge 1 \right). \end{aligned} \quad (44)$$

What's left is to upper bound the quantity  $2\beta \sum_{t \in [T]} (1 \wedge \|X_t\|_{V_{t-1}^{-1}})$ . Following the trick introduced by the authors of [1], we apply Cauchy-Schwarz inequality to the term  $\sum_{t \in [T]} (1 \wedge \|X_t\|_{V_{t-1}^{-1}})$ .

$$\sum_{t \in [T]} (1 \wedge \|X_t\|_{V_{t-1}^{-1}}) \leq \sqrt{T} \sqrt{\sum_{t \in [T]} 1 \wedge \|X_t\|_{V_{t-1}^{-1}}^2}. \quad (45)$$

By dividing the whole time horizon into consecutive pieces of length  $w$ , we have

$$\sqrt{\sum_{t \in [T]} 1 \wedge \|X_t\|_{V_{t-1}^{-1}}^2} \leq \sqrt{\sum_{i=0}^{\lceil T/w \rceil - 1} \sum_{t=i \cdot w + 1}^{(i+1)w} 1 \wedge \|X_t\|_{V_{t-1}^{-1}}^2}. \quad (46)$$

While a similar quantity has been analyzed by Lemma 11 of [1], we note that due to the fact that  $V_t$ 's are accumulated according to the sliding window principle, the key eq. (6) in Lemma 11's proof breaks, and thus the analysis of [1] cannot be applied here. To this end, we state a technical lemma based on a novel use of the Sherman-Morrison formula.

**Lemma 5.** For any  $i \leq \lceil T/w \rceil - 1$ ,

$$\sum_{t=i \cdot w + 1}^{(i+1)w} 1 \wedge \|X_t\|_{V_{t-1}^{-1}}^2 \leq \sum_{t=i \cdot w + 1}^{(i+1)w} 1 \wedge \|X_t\|_{\bar{V}_{t-1}^{-1}}^2,$$

where

$$\bar{V}_{t-1} = \sum_{s=i \cdot w + 1}^{t-1} X_s X_s^\top + \lambda I. \quad (47)$$

*Proof.* Proof of Lemma 5. For a fixed  $i \leq \lceil T/w \rceil - 1$ ,

$$\begin{aligned} \sum_{t=i \cdot w + 1}^{(i+1)w} 1 \wedge \|X_t\|_{V_{t-1}^{-1}}^2 &= \sum_{t=i \cdot w + 1}^{(i+1)w} 1 \wedge X_t^\top V_{t-1}^{-1} X_t \\ &= \sum_{t=i \cdot w + 1}^{(i+1)w} 1 \wedge X_t^\top \left( \sum_{s=1 \vee (t-w)}^{t-1} X_s X_s^\top + \lambda I \right)^{-1} X_t. \end{aligned} \quad (48)$$

Note that  $i \cdot w + 1 \geq 1$  and  $i \cdot w + 1 \geq t - w \forall t \leq (i+1)w$ , we have

$$i \cdot w + 1 \geq 1 \vee (t - w). \quad (49)$$

Consider any  $d$ -by- $d$  positive definite matrix  $A$  and  $d$ -dimensional vector  $y$ , then by the Sherman-Morrison formula, the matrix

$$B = A^{-1} - (A + yy^\top)^{-1} = A^{-1} - A^{-1} + \frac{A^{-1}yy^\top A^{-1}}{1 + y^\top A^{-1}y} = \frac{A^{-1}yy^\top A^{-1}}{1 + y^\top A^{-1}y} \quad (50)$$

is positive semi-definite. Therefore, for a given  $t$ , we can iteratively apply this fact to obtain

$$\begin{aligned} &X_t^\top \left( \sum_{s=i \cdot w + 1}^{t-1} X_s X_s^\top + \lambda I \right)^{-1} X_t \\ &= X_t^\top \left( \sum_{s=i \cdot w}^{t-1} X_s X_s^\top + \lambda I \right)^{-1} X_t + X_t^\top \left( \left( \sum_{s=i \cdot w + 1}^{t-1} X_s X_s^\top + \lambda I \right)^{-1} - \left( \sum_{s=i \cdot w}^{t-1} X_s X_s^\top + \lambda I \right)^{-1} \right) X_t \\ &= X_t^\top \left( \sum_{s=i \cdot w}^{t-1} X_s X_s^\top + \lambda I \right)^{-1} X_t + X_t^\top \left( \left( \sum_{s=i \cdot w + 1}^{t-1} X_s X_s^\top + \lambda I \right)^{-1} - \left( X_{i \cdot w} X_{i \cdot w}^\top + \sum_{s=i \cdot w + 1}^{t-1} X_s X_s^\top + \lambda I \right)^{-1} \right) X_t \end{aligned}$$

$$\begin{aligned}
 &\geq X_t^\top \left( \sum_{s=i \cdot w}^{t-1} X_s X_s^\top + \lambda I \right)^{-1} X_t \\
 &\quad \vdots \\
 &\geq X_t^\top \left( \sum_{s=1 \vee (t-w)}^{t-1} X_s X_s^\top + \lambda I \right)^{-1} X_t.
 \end{aligned} \tag{51}$$

Plugging inequality (51) to (48), we have

$$\begin{aligned}
 \sum_{t=i \cdot w+1}^{(i+1)w} 1 \wedge \|X_t\|_{V_{t-1}^{-1}}^2 &\leq \sum_{t=i \cdot w+1}^{(i+1)w} 1 \wedge X_t^\top \left( \sum_{s=i \cdot w+1}^{t-1} X_s X_s^\top + \lambda I \right)^{-1} X_t \\
 &\leq \sum_{t=i \cdot w+1}^{(i+1)w} 1 \wedge \|X_t\|_{V_{t-1}^{-1}}^2,
 \end{aligned} \tag{52}$$

which concludes the proof.  $\square$

From Lemma 5 and eq. (46), we know that

$$\begin{aligned}
 2\beta \sum_{t \in [T]} \left( 1 \wedge \|X_t\|_{V_{t-1}^{-1}} \right) &\leq 2\beta \sqrt{T} \cdot \sqrt{\sum_{i=0}^{\lceil T/w \rceil - 1} \sum_{t=i \cdot w+1}^{(i+1)w} 1 \wedge \|X_t\|_{V_{t-1}^{-1}}^2} \\
 &\leq 2\beta \sqrt{T} \cdot \sqrt{\sum_{i=0}^{\lceil T/w \rceil - 1} 2d \ln \left( \frac{d\lambda + wL^2}{d\lambda} \right)} \\
 &\leq 2\beta T \sqrt{\frac{2d}{w} \ln \left( \frac{d\lambda + wL^2}{d\lambda} \right)}.
 \end{aligned} \tag{53}$$

Here, eq. (53) follows from Lemma 11 of [1].

Now putting these two parts to eq. (44), we have

$$\begin{aligned}
 \mathbf{E} [\text{Regret}_T (\text{SW-UCB algorithm})] &\leq 2LwB_T + 2\beta T \sqrt{\frac{2d}{w} \ln \left( \frac{d\lambda + wL^2}{d\lambda} \right)} + 2T\delta \\
 &= 2LwB_T + \frac{2T}{\sqrt{w}} \left( R \sqrt{d \ln \left( \frac{1 + wL^2/\lambda}{\delta} \right)} + \sqrt{\lambda} S \right) \sqrt{2d \ln \left( \frac{d\lambda + wL^2}{d\lambda} \right)} + 2T\delta.
 \end{aligned} \tag{54}$$

Now if  $B_T$  is known, we can take  $w = O\left((dT)^{2/3} B_t^{-2/3}\right)$  and  $\delta = 1/T$ , we have

$$\mathbf{E} [\text{Regret}_T (\text{SW-UCB algorithm})] = \tilde{O} \left( d^{\frac{2}{3}} B_T^{\frac{1}{3}} T^{\frac{2}{3}} \right);$$

while if  $B_T$  is not known taking  $w = O\left((dT)^{2/3}\right)$  and  $\delta = 1/T$ , we have

$$\mathbf{E} [\text{Regret}_T (\text{SW-UCB algorithm})] = \tilde{O} \left( d^{\frac{2}{3}} (B_T + 1) T^{\frac{2}{3}} \right).$$

## E Proof of Lemma 3

For any block  $i$ , the absolute sum of rewards can be written as

$$\left| \sum_{t=(i-1)H+1}^{i \cdot H \wedge T} \langle X_t, \theta_t \rangle + \eta_t \right| \leq \sum_{t=(i-1)H+1}^{i \cdot H \wedge T} |\langle X_t, \theta_t \rangle| + \left| \sum_{t=(i-1)H+1}^{i \cdot H \wedge T} \eta_t \right| \leq H + \left| \sum_{t=(i-1)H+1}^{i \cdot H \wedge T} \eta_t \right|,$$

where we have iteratively applied the triangular inequality as well as the fact that  $|\langle X_t, \theta_t \rangle| \leq 1$  for all  $t$ .

Now by property of the  $R$ -sub-Gaussian [22], we have the absolute value of the noise term  $\eta_t$  exceeds  $2R\sqrt{\ln T}$  for a fixed  $t$  with probability at most  $1/T^2$  *i.e.*,

$$\Pr \left( \left| \sum_{t=(i-1)H+1}^{i \cdot H \wedge T} \eta_t \right| \geq 2R\sqrt{H \ln \frac{T}{\sqrt{H}}} \right) \leq \frac{2H}{T^2}. \quad (55)$$

Applying a simple union bound, we have

$$\Pr \left( \exists i \in \left[ \frac{T}{H} \right] : \left| \sum_{t=(i-1)H+1}^{i \cdot H \wedge T} \eta_t \right| \geq 2R\sqrt{H \ln \frac{T}{\sqrt{H}}} \right) \leq \sum_{i=1}^{\lceil T/H \rceil} \Pr \left( \left| \sum_{t=(i-1)H+1}^{i \cdot H \wedge T} \eta_t \right| \geq 2R\sqrt{H \ln \frac{T}{\sqrt{H}}} \right) \leq \frac{2}{T}. \quad (56)$$

Therefore, we have

$$\Pr \left( Q \geq H + 2R\sqrt{H \ln \frac{T}{\sqrt{H}}} \right) \leq \Pr \left( \exists i \in \left[ \frac{T}{H} \right] : \left| \sum_{t=(i-1)H+1}^{i \cdot H \wedge T} \eta_t \right| \geq 2R\sqrt{H \ln \frac{T}{\sqrt{H}}} \right) \leq \frac{2}{T}. \quad (57)$$

The statement then follows.
